# Supplementary material for: The impact of long-term changes in ocean waves and storm surge on coastal shoreline change: a case study of Bass Strait and south-east Australia
Source: Copernicus journal article supplement (doi:10.5194/nhess-24-2175-2024), 2024-07-01
Supplement: Supplementary file 1 [file nhess-24-2175-2024-supplement.pdf]

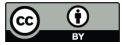

*Supplement of*

**The impact of long-term changes in ocean waves and storm surge on coastal shoreline change: a case study of Bass Strait and south-east Australia**

**Mandana Ghanavati et al.**

*Correspondence to:* Ian R. Young ([ian.young@unimelb.edu.au](mailto:ian.young@unimelb.edu.au))

The copyright of individual parts of the supplement might differ from the article licence.

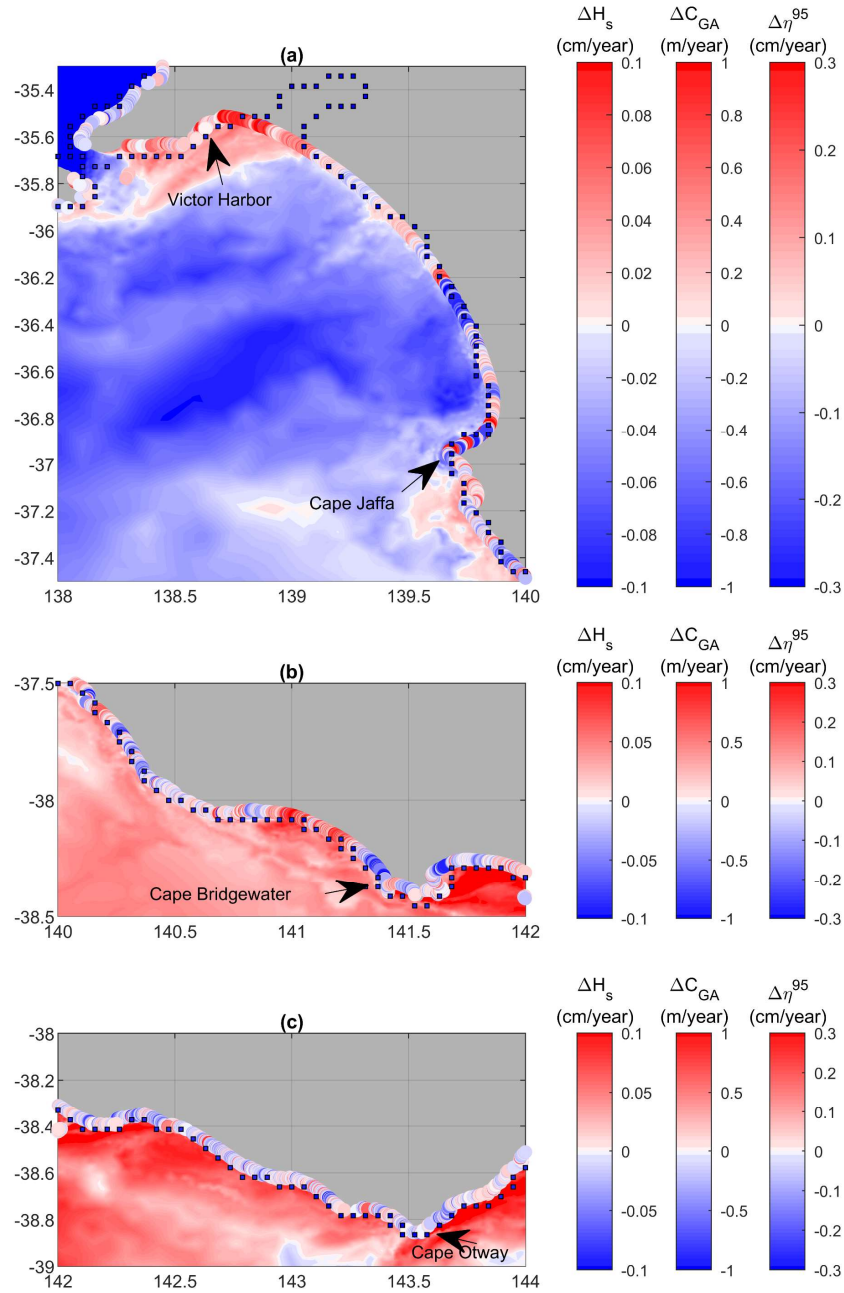

Figure S1 a-c: Trends in: significant wave height,  $\Delta H_s$  shown as colour shaded values over the domain, storm surge,  $\Delta \eta^{95}$  shown as colour shaded squares at coastal model locations and shoreline progradation/recession,  $\Delta C_{GA}$  shown as colour shaded circles at beach locations. Results shown for sections (a) 138E°-140E°, (b) 140E°-142E°, (c) 142E°-144E°.

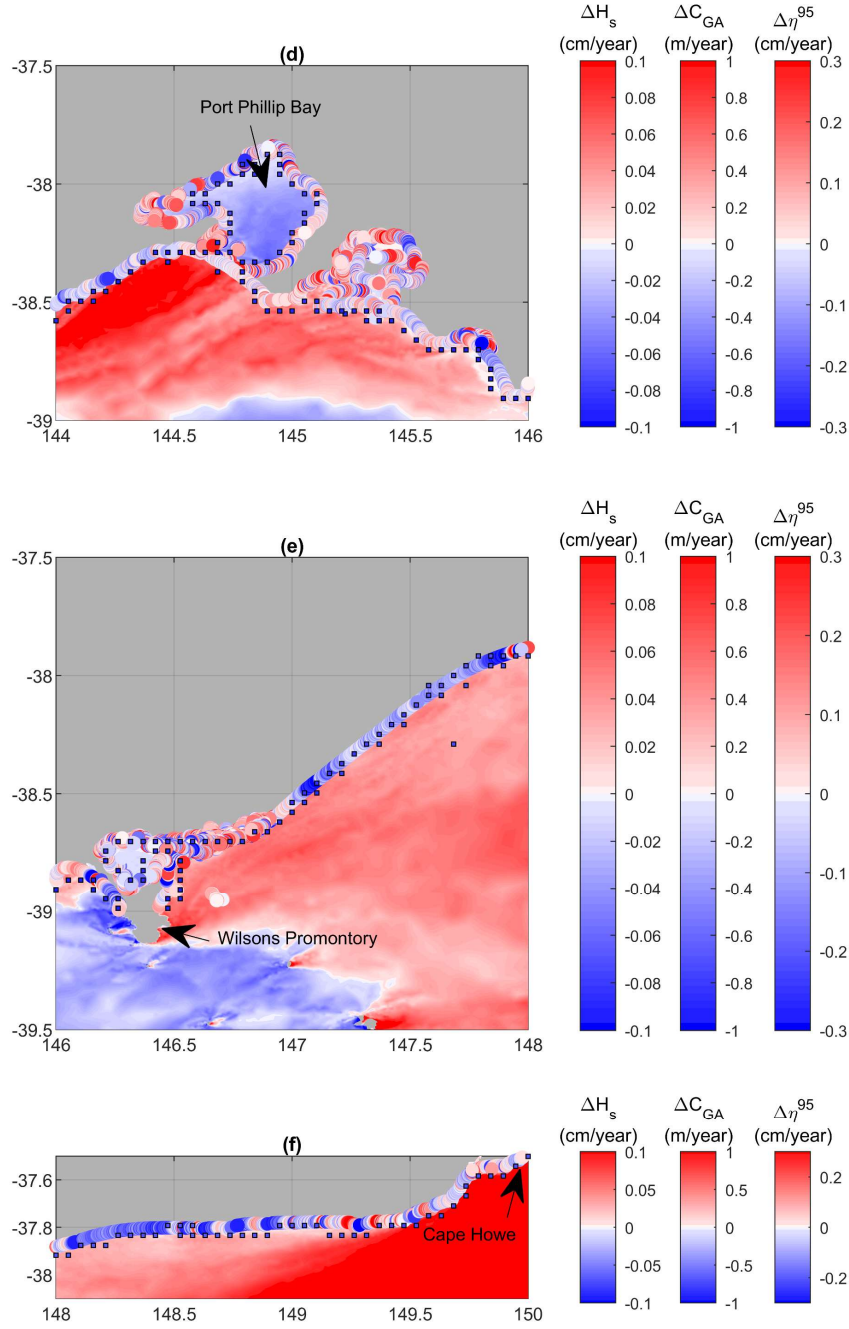

Figure S1 d-f: Trends in: significant wave height,  $\Delta H_s$  shown as colour shaded values over the domain, storm surge,  $\Delta \eta^{95}$  shown as colour shaded squares at coastal model locations and shoreline progradation/recession,  $\Delta C_{GA}$  shown as colour shaded circles at beach locations. Results shown for sections (d) 144E°-146E°, (e) 146E°-148E° and (f) 148E°-150E°.

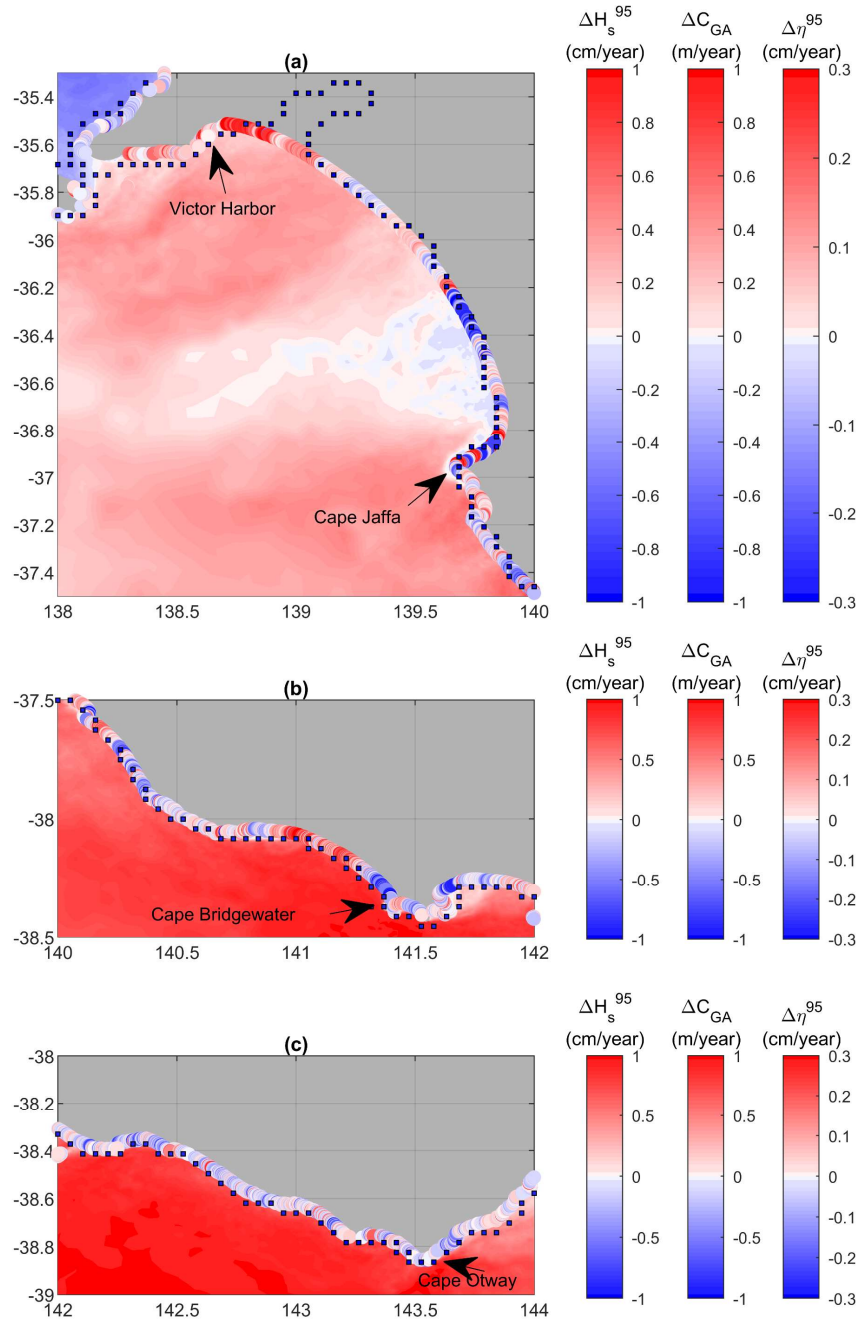

Figure S2 a-c: Trends in: 95<sup>th</sup> percentile significant wave height,  $\Delta H_s^{95}$  shown as colour shaded values over the domain, storm surge,  $\Delta \eta^{95}$  shown as colour shaded squares at coastal model locations and shoreline progradation/recession,  $\Delta C_{GA}$  shown as colour shaded circles at beach locations. Results shown for sections (a) 138E°-140E°, (b) 140E°-142E°, (c) 142E°-144E°.

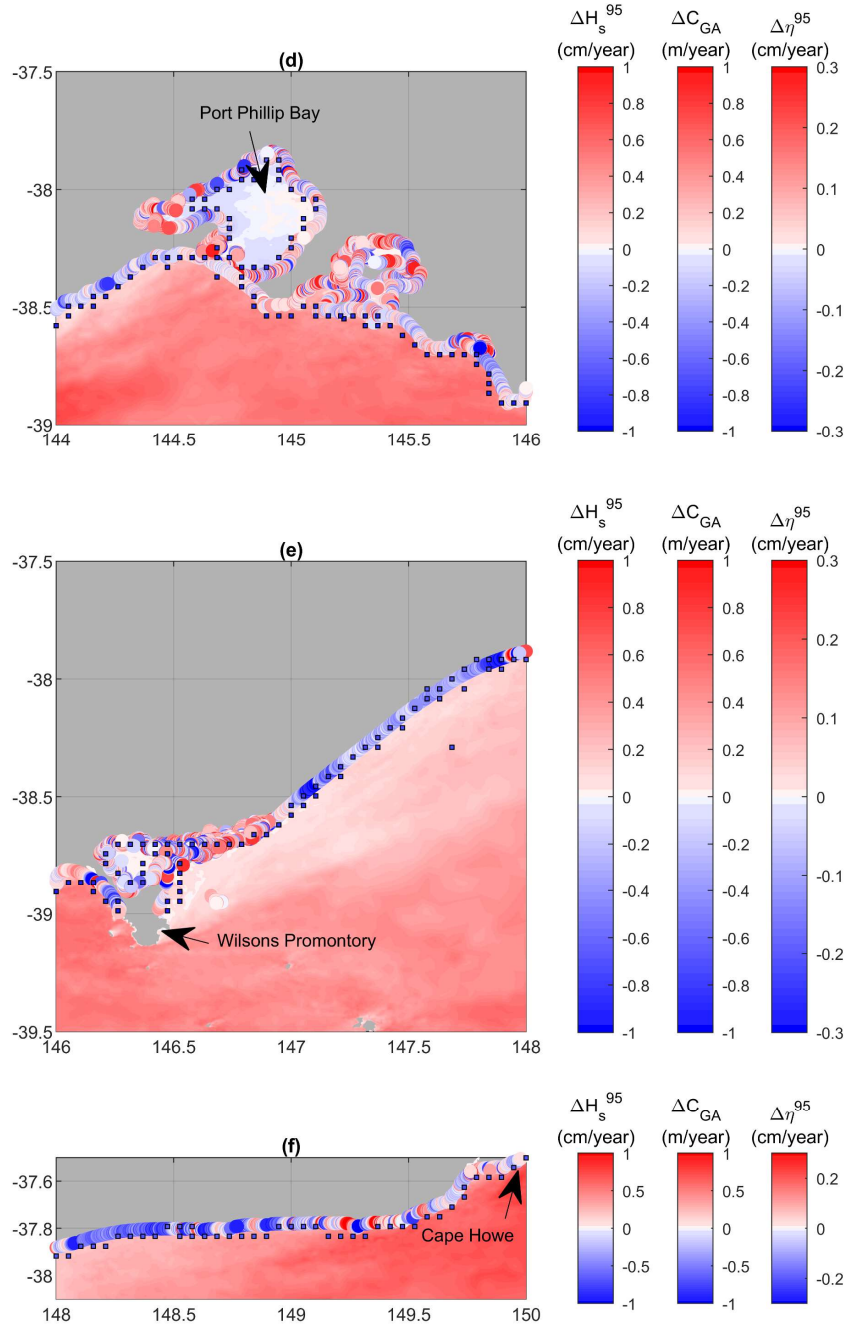

Figure S2 d-f: Trends in: 95<sup>th</sup> percentile significant wave height,  $\Delta H_s^{95}$  shown as colour shaded values over the domain, storm surge,  $\Delta \eta^{95}$  shown as colour shaded squares at coastal model locations and shoreline progradation/recession,  $\Delta C_{GA}$  shown as colour shaded circles at beach locations. Results shown for sections (d) 144E°-146E°, (e) 146E°-148E° and (f) 148E°-150E°.

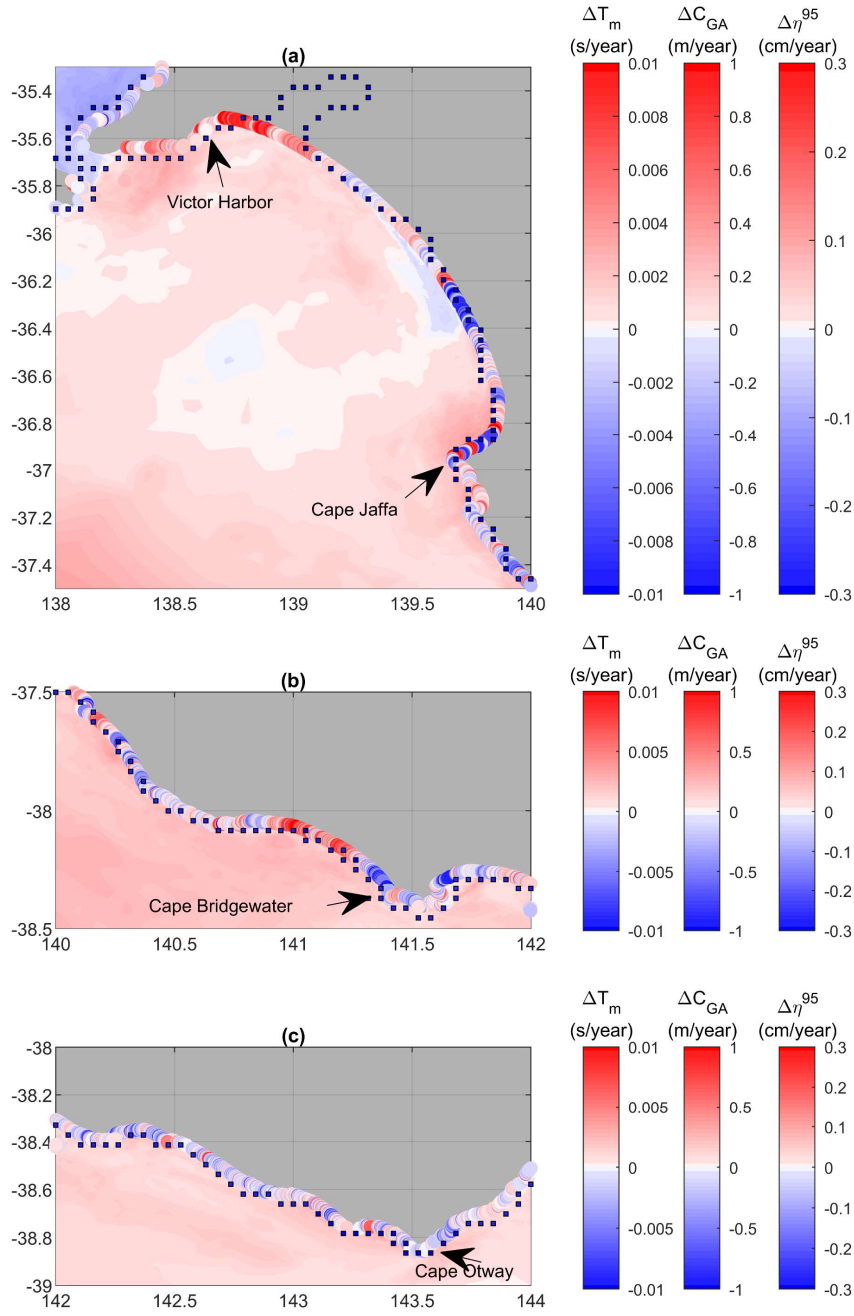

Figure S3 a-c: Trends in: mean wave period,  $\Delta T_m$  shown as colour shaded values over the domain, storm surge,  $\Delta \eta^{95}$  shown as colour shaded squares at coastal model locations and shoreline progradation/recession,  $\Delta C_{GA}$  shown as colour shaded circles at beach locations. Results shown for sections (a) 138E°-140E°, (b) 140E°-142E°, (c) 142E°-144E°.

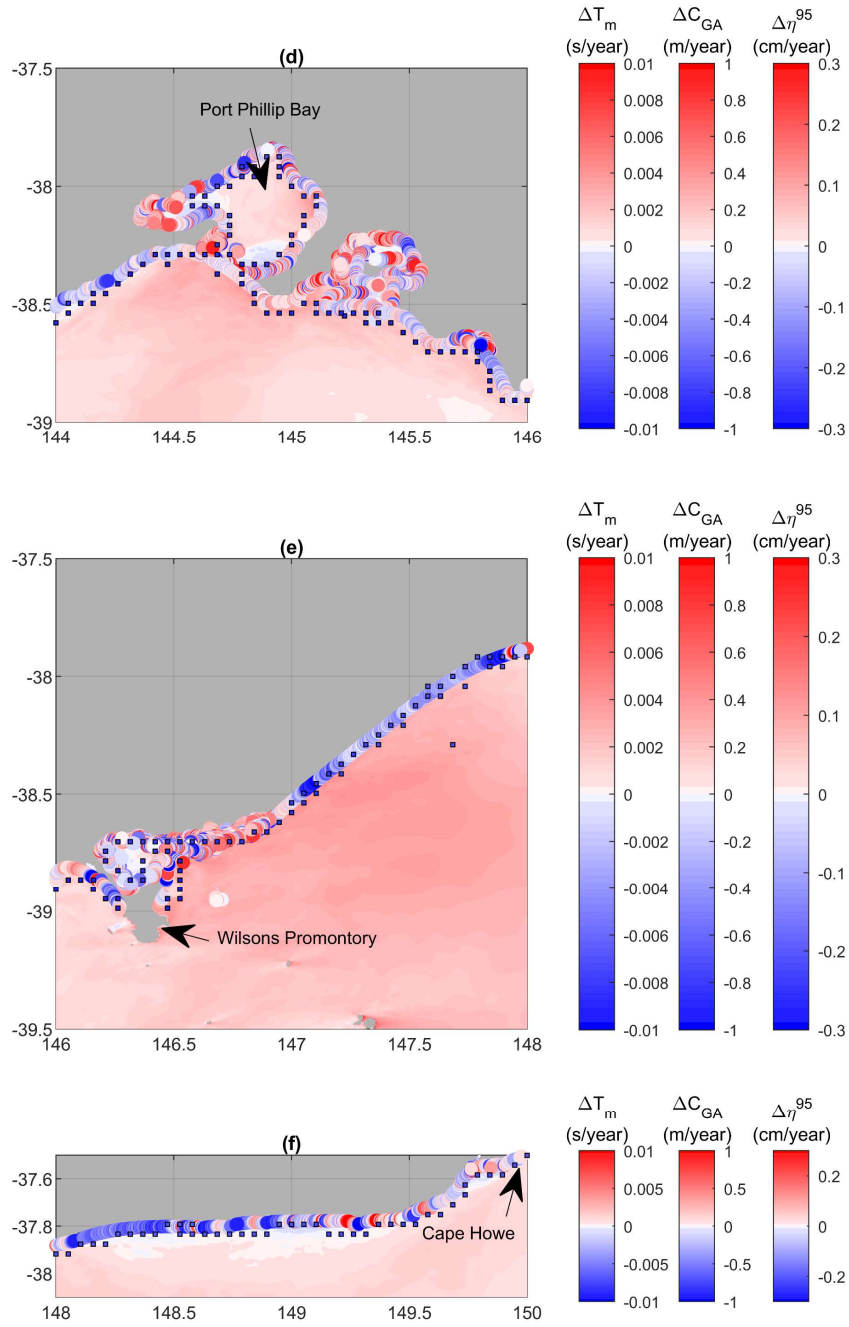

Figure S3 d-f: Trends in: mean wave period,  $\Delta T_m$  shown as colour shaded values over the domain, storm surge,  $\Delta \eta^{95}$  shown as colour shaded squares at coastal model locations and shoreline progradation/recession,  $\Delta C_{GA}$  shown as colour shaded circles at beach locations. Results shown for sections (d) 144E°-146E°, (e) 146E°-148E° and (f) 148E°-150E°.

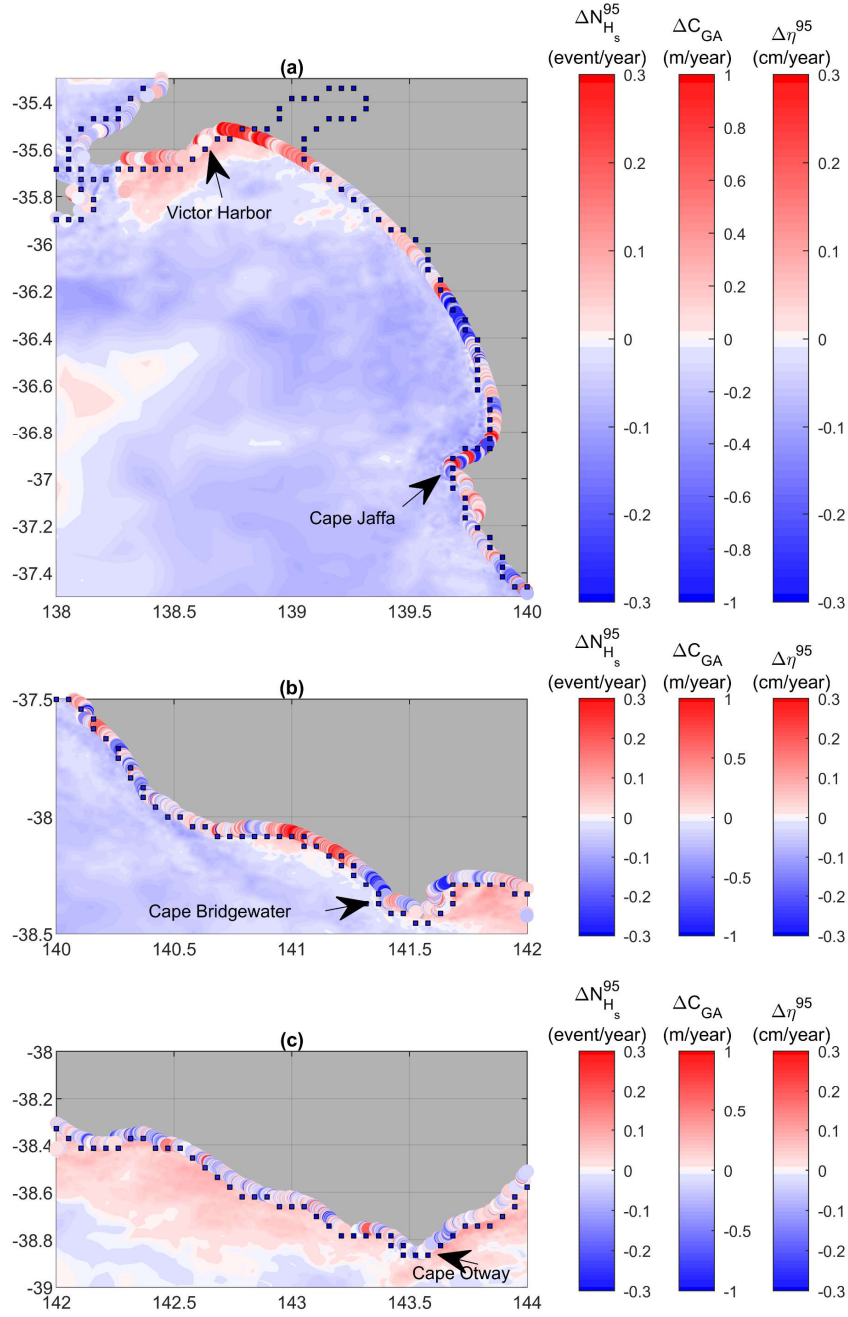

Figure S4 a-c: Trends in: number of extreme significant wave height events,  $\Delta N_{H_s}^{95}$  shown as colour shaded values over the domain, storm surge,  $\Delta \eta^{95}$  shown as colour shaded squares at coastal model locations and shoreline progradation/recession,  $\Delta C_{GA}$  shown as colour shaded circles at beach locations. Results shown for sections (a) 138E°-140E°, (b) 140E°-142E°, (c) 142E°-144E°.

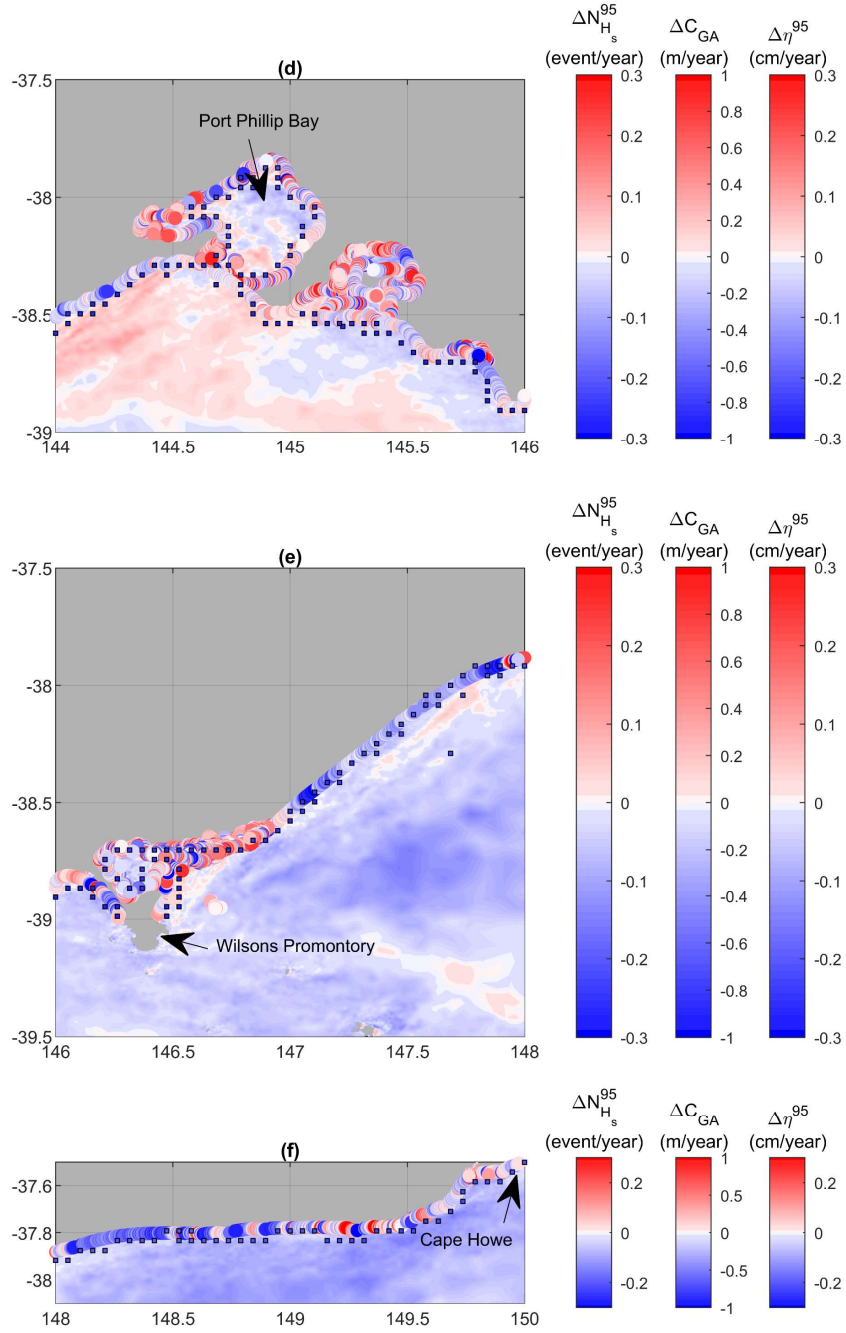

Figure S4 d-f: Trends in: number of extreme significant wave height events,  $\Delta N_{H_s}^{95}$  shown as colour shaded values over the domain, storm surge,  $\Delta \eta^{95}$  shown as colour shaded squares at coastal model locations and shoreline progradation/recession,  $\Delta C_{GA}$  shown as colour shaded circles at beach locations. Results shown for sections (d) 144E°-146E°, (e) 146E°-148E° and (f) 148E°-150E°.
